# Supplementary material for: Long Non-Coding RNA KCNQ1OT1 Regulates Protein Kinase CK2 Via miR-760 in Senescence and Calorie Restriction
Source: MDPI journal article supplement (doi:10.3390/ijms23031888), 2022-02-08
Supplement: s1 [file s1]

Supplementary Table S2. Primers used for RT-PCR analyses

| Gene           | Primer sequence |                              |
|----------------|-----------------|------------------------------|
| KCNQ1OT1-1     | Forward         | 5'-CACTTCCAGTCCCACACCCT-3'   |
|                | Reverse         | 5'-CGCTGAGAACCACTCATTCA-3'   |
| KCNQ1OT1-2     | Forward         | 5'-AGCAGCCAGAAGGATGAGAA-3'   |
|                | Reverse         | 5'-ACCAGAAGGCAGAATGATGG-3'   |
| CK2 $\alpha$   | Forward         | 5'-AAGACCCTGTGTCACGAACCC-3'  |
|                | Reverse         | 5'-GGCTCCTCCCGAAAGATCATAC-3' |
| IL1 $\beta$    | Forward         | 5'-AGTGGCAATGAGGATGACTTGT-3' |
|                | Reverse         | 5'-AGATGAAGGGAAAGAAGGTGCT-3' |
| IL6            | Forward         | 5'-CACACAGACAGCCACTCACC-3'   |
|                | Reverse         | 5'-AGGTTGTTTTCTGCCAGTGC-3'   |
| MMP3           | Forward         | 5'-CTCACAGACCTGACTCGGTT-3'   |
|                | Reverse         | 5'-CACGCCTGAAGGAAGAGATG-3'   |
| $\beta$ -actin | Forward         | 5'-TCCCTGGAGAAGAGCTACGA-3'   |
|                | Reverse         | 5'-AGCACTGTGTTGGCGTACAG-3'   |
