# Supplementary material for: Long Non-Coding RNA KCNQ1OT1 Regulates Protein Kinase CK2 Via miR-760 in Senescence and Calorie Restriction
Source: MDPI journal article supplement (doi:10.3390/ijms23031888), 2022-02-08
Supplement: s1 [file s1]

### **Supplementary figure legends**

Figure S1. The sequences and binding sites of lncRNA KCNQ1OT1, miR-760, and CK2 $\alpha$  mRNA, which were determined with TargetScan and miRanda. SD, silencing domain; LINE, long interspersed element; ORF, open reading frame.
