# Supplementary material for: Long Non-Coding RNA KCNQ1OT1 Regulates Protein Kinase CK2 Via miR-760 in Senescence and Calorie Restriction
Source: MDPI journal article supplement (doi:10.3390/ijms23031888), 2022-02-08
Supplement: s1 [file s1]

Supplementary Table S1. Sequences of miR-760 mimic and inhibitor used in this study.

|                   |                                                                              |
|-------------------|------------------------------------------------------------------------------|
| miR-760 mimic     | Forward: 5'-CGGCUCUGGGUCUGUGGGGA-3'<br>Reverse: 5'-UCCCACAGACCCAGAGCCG-3'    |
| negative control  | Forward: 5'-ACGUGACACGUUCGGAGAAUU-3'<br>Reverse: 5'-UUCUCCGAACGUGUCACGUUU-3' |
| miR-760 inhibitor | RRRQRRKKRR-OO-TCCCCACAGACCCAGAGCCG                                           |
| negative control  | RRRQRRKKRR-OO-CTCCCTTCAATC                                                   |

RRRQRRKKRR, cell penetrating peptide; OO, AEEA linker.
