# Supplementary material for: Long Non-Coding RNA KCNQ1OT1 Regulates Protein Kinase CK2 Via miR-760 in Senescence and Calorie Restriction
Source: Int J Mol Sci. 2022 Feb 8;23(3):1888. doi: 10.3390/ijms23031888 (PMC8836653; doi:10.3390/ijms23031888)
Supplement: Supplementary file 1 [file ijms-23-01888-s001.zip]

Archive with 4 entries (4 files):
- Figure S1.tif
- Supplementary Figure legends.pdf
- Supplementary Table S1.pdf
- Supplementary Table S2.pdf
